# Supplementary material for: Tissue Sheet Engineered Using Human Umbilical Cord-Derived Mesenchymal Stem Cells Improves Diabetic Wound Healing
Source: MDPI journal article supplement (doi:10.3390/ijms232012697), 2022-10-21
Supplement: s1 [file s1]

## Supplementary Information

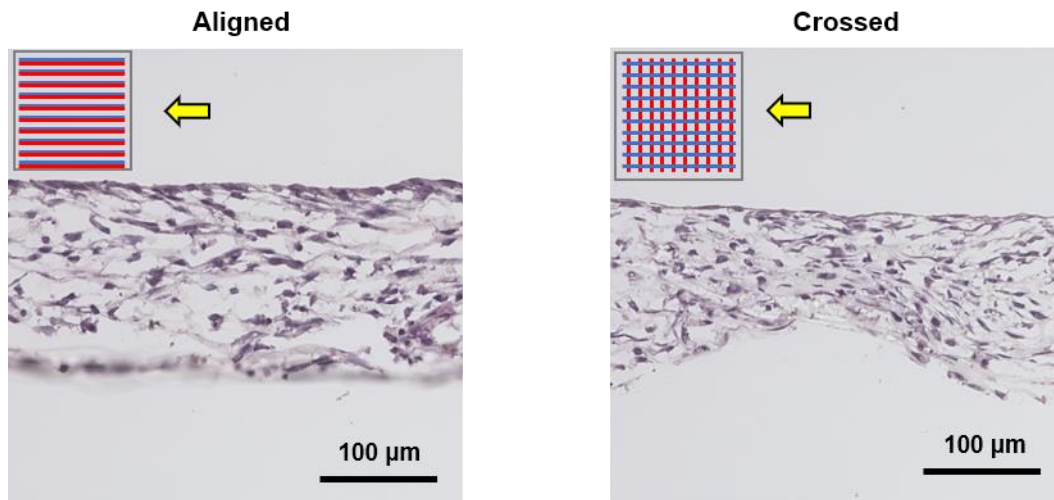

**Figure S1.** Tissue sheet formation of human umbilical cord mesenchymal stem cell (hUC-MSC) using poly(lactide-co-glycolide) scaffold. Hematoxylin and eosin staining of hUC-MSC tissue sheets with different fiber structures (aligned and crossed). Scale bar = 100  $\mu\text{m}$ . The yellow arrowheads show a schematic of the two types of PLGA fiber structures.

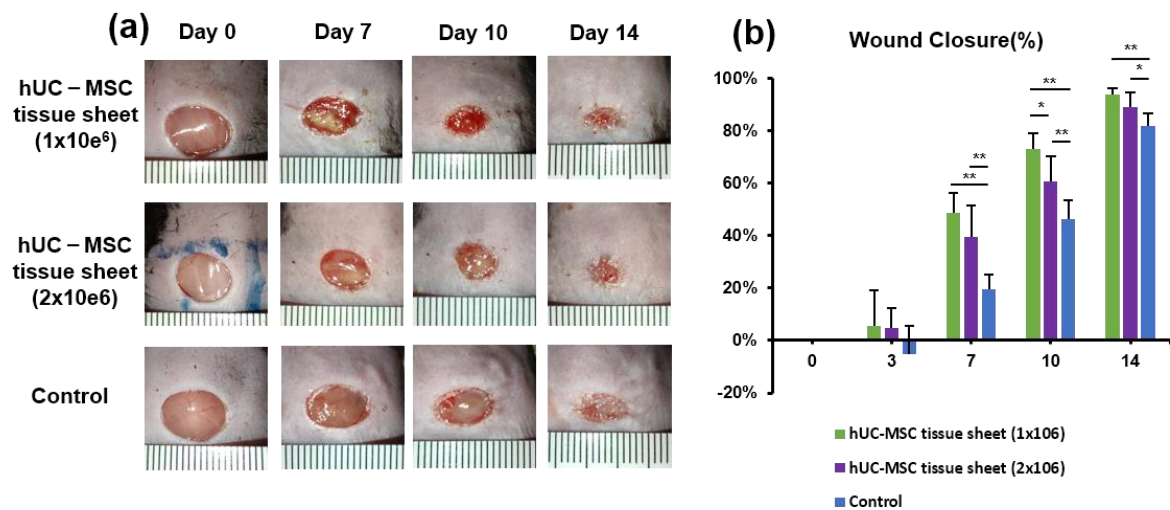

**Figure S2.** Tissue sheets with different cell numbers promote wound healing. (a) Representative photographs of full-thickness excision wounds on days 0, 7, 10, and 14 after wounding. (b) Quantitative analysis of the rate of wound closure in each group. Significance was determined using analysis of variance ANOVA. \*  $p < 0.05$ , \*\*  $p < 0.01$ .
